# Supplementary material for: Genetic diversity and drug susceptibility profiles of Mycobacterium tuberculosis obtained from Saint Peter’s TB specialized Hospital, Ethiopia
Source: PLOS journal article supplement (doi:10.1371/journal.pone.0218545), 2019-06-24
Supplement: S2 (10.1371/journal.pone.0218545.s002) [file journal.pone.0218545.s002]

**S2 Table. Orphan Spoligotype patterns of *M. tuberculosis* isolates (n=37) obtained from smear positive pulmonary patients at St. Peter's TB specialized Hospital in 2015-2016, Addis Ababa, Ethiopia**

| S/N | Isolates(n) | Family  | CBN lineage/sublineage | Octal number    | Binary format |
|-----|-------------|---------|------------------------|-----------------|---------------|
| 1   | 2           | T1      | EA                     | 77777575720771  |               |
| 2   | 1           | LAM1    | EA                     | 67777407740771  |               |
| 3   | 1           | T1      | EA                     | 77777577420771  |               |
| 4   | 1           | T3      | EA                     | 777000177740771 |               |
| 5   | 1           | CAS     | UN                     | 703777500003771 |               |
| 6   | 1           | T3      | EA                     | 777000177760771 |               |
| 7   | 1           | EA14    | IO                     | 763777540003171 |               |
| 8   | 1           | EA14    | IO                     | 77777540003771  |               |
| 9   | 3           | T1      | EA                     | 777737577760771 |               |
| 10  | 1           | EA14    | IO                     | 773777540003171 |               |
| 11  | 1           | EA14    | IO                     | 747777540005171 |               |
| 12  | 1           | T3      | EA                     | 777001777607771 |               |
| 13  | 1           | T3      | EA                     | 777000177760771 |               |
| 14  | 1           | T1      | EA                     | 777727577760731 |               |
| 15  | 1           | CAS     | IO                     | 723377400001771 |               |
| 16  | 1           | LAM9    | EA                     | 777777401760771 |               |
| 17  | 2           | CAS     | IO                     | 723777740003571 |               |
| 18  | 1           | T1      | EA                     | 77777647760771  |               |
| 19  | 3           | CAS     | IO                     | 723377400001771 |               |
| 20  | 2           | T1      | EA                     | 67777647760771  |               |
| 21  | 1           | T3      | EA                     | 777002377760771 |               |
| 22  | 4           | CAS     | IO                     | 723777740003571 |               |
| 23  | 1           | T3      | EA                     | 777003377760771 |               |
| 24  | 2           | T3      | EA                     | 777003377760771 |               |
| 25  | 2           | Haarlem | EA                     | 777430477207711 |               |

CAS, Central Asian; LAM, Latin American Mediterranean; EAI, East African Indian; H, Haarlem; T, Tuscany; UN, Unclassified; SIT, Spoligo International Type. CBN: Conformal Bayesian Network. The black and white boxes show the presence and absence of the specific at positions 1-43 in the DRlocus.
